# Supplementary material
Source: PubMed Central journal article supplement (PMC8627550)
Supplement: joces-135-259091-s1.pdf [file joces-135-259091-s1.pdf]

**A** Percentage of peroxisomal perimeter covered by wrappER in the liver of *Mtpp*<sup>+/+</sup> and *Mtpp*<sup>-/-</sup> mice

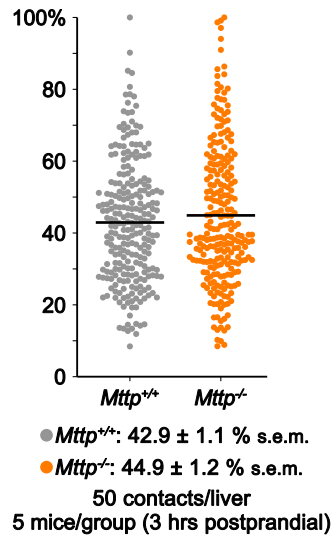

**B** WrappER-peroxisomes contacts distance in the mouse liver

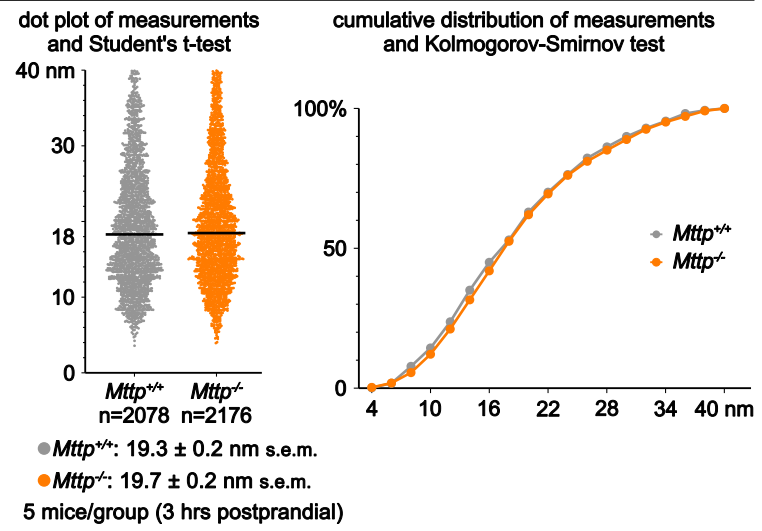

**C** Percentage of wrappER-peroxisome contacts with adhesion sites

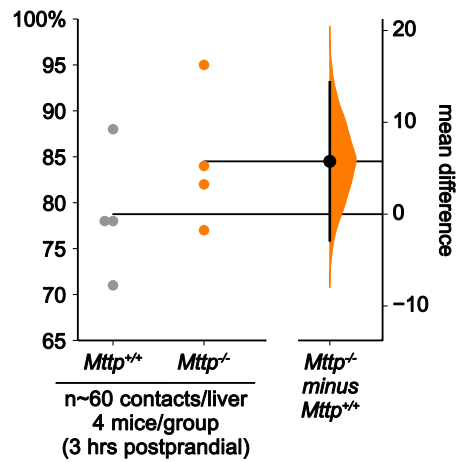

**D** WrappER-peroxisome adhesion sites length (2D-EM analysis)

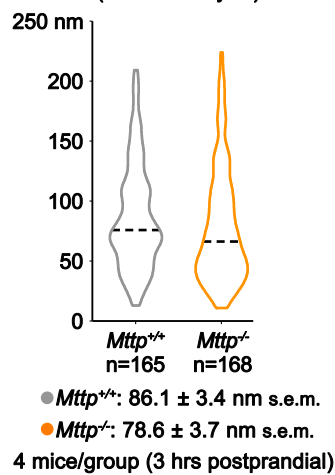

**E** Mouse liver peroxisome area (2D-EM analysis)

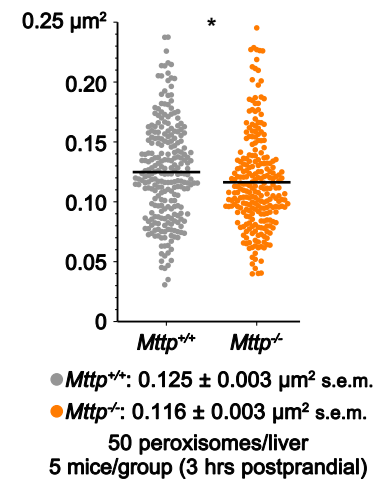

**Fig. S1. Loss of *Mttp* expression in the liver does not affect the wrappER-peroxisome contact.** (A) Percentage of peroxisomal perimeter covered by wrappER in *Mttp*<sup>+/+</sup> and *Mttp*<sup>-/-</sup> mouse livers. In the graph, a dot indicates the value calculated for a single peroxisome. (B) WrappER-peroxisome contact distances in *Mttp*<sup>+/+</sup> and *Mttp*<sup>-/-</sup> mouse livers (left panel). Cumulative distribution of the values plotted in the left panel (*P* value calculated by Kolmogorov-Smirnov test). Note that ribosome-containing long-range contacts (40-60 nm) were not included in this analysis. (C) Percentage of wrappER-peroxisome contacts with ≥ 1 adhesion site in *Mttp*<sup>+/+</sup> and *Mttp*<sup>-/-</sup> mouse livers (each dot indicates the value per liver). Data were analyzed by estimation statistics and plotted in a Gardner-Altman graph; the mean difference is indicated by the dot on the right panel and is plotted as a bootstrap sampling distribution. The 95% confidence interval is indicated by the vertical error bar. (D) Average length of wrappER-peroxisome adhesion sites in *Mttp*<sup>+/+</sup> and *Mttp*<sup>-/-</sup> mouse livers. The graph shows the violin plot of the data collected through quantitative 2D-EM morphometric analysis. (E) Peroxisome area in *Mttp*<sup>+/+</sup> and *Mttp*<sup>-/-</sup> mouse livers. In the graph, each dot indicates the area of a single peroxisome. The *P* value were calculated by Student's t-test unless otherwise indicated. Data were collected from mouse livers at 3 hours postprandial. For quantitative 2D-EM analysis, data were collected from EM images taken at the same magnification.

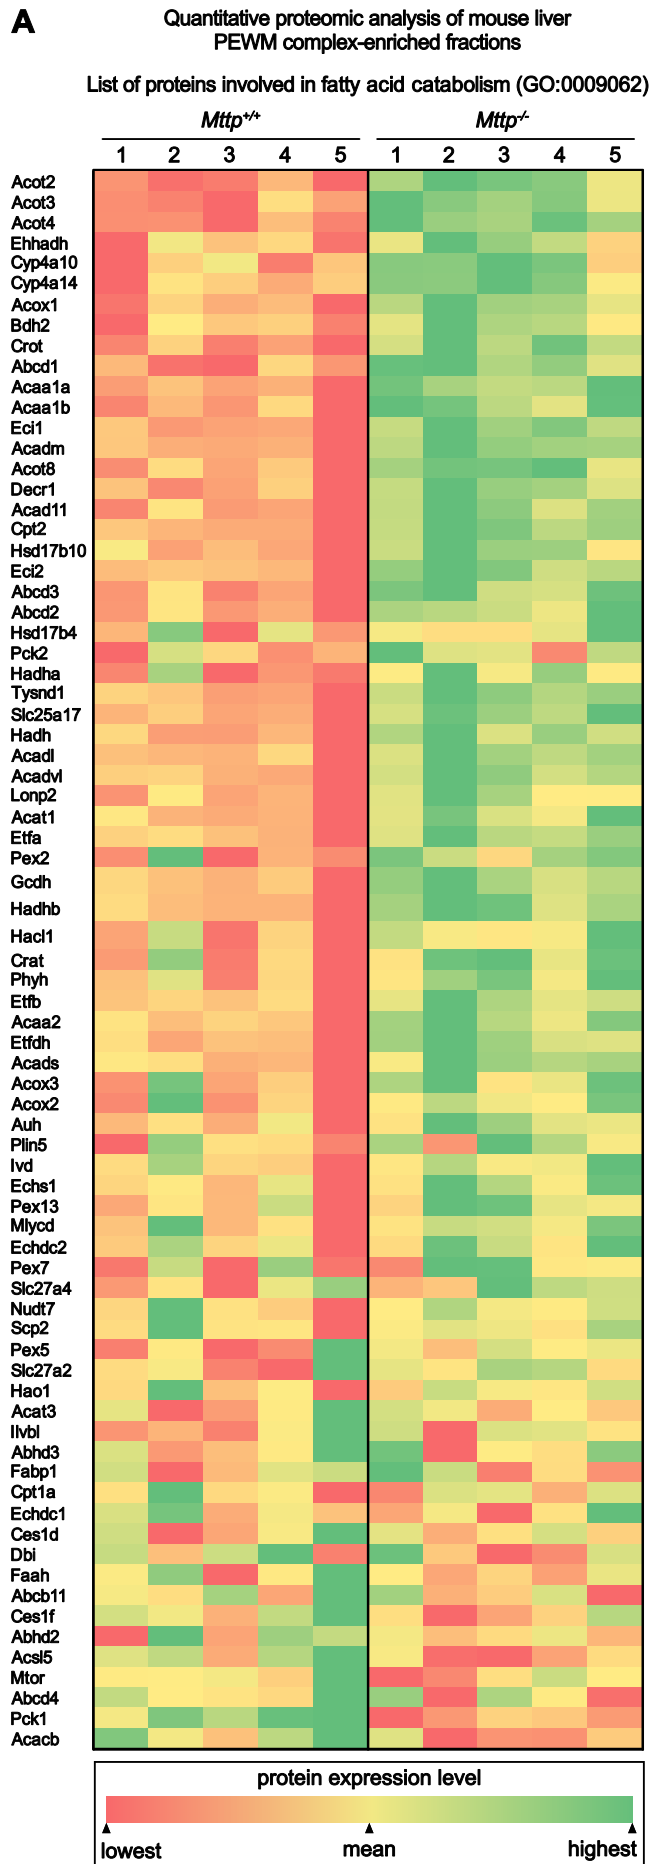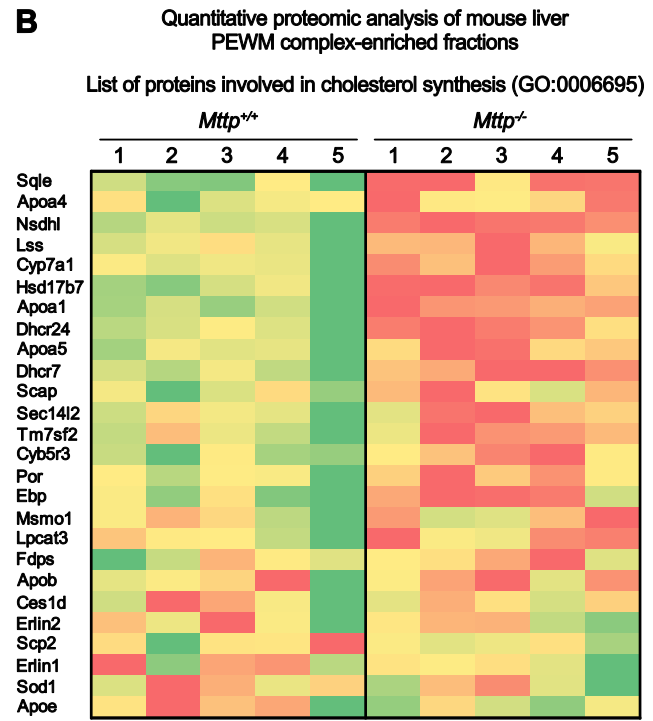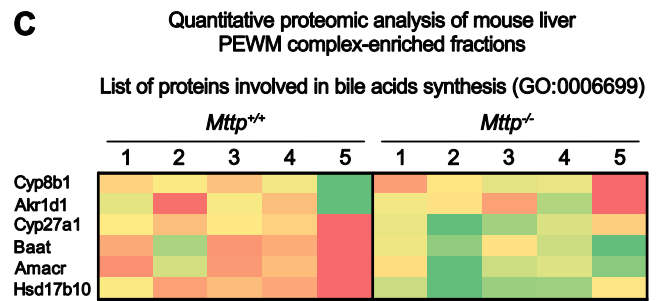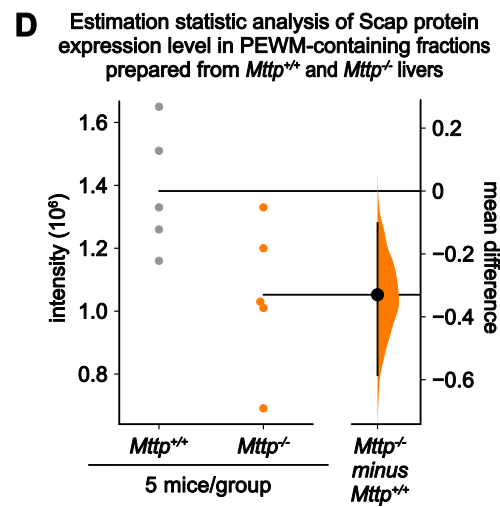

**Fig. S2. Loss of Mttp expression in the liver upregulates hepatic fatty acids catabolism and downregulates cholesterol synthesis.** (A-C) Comparative quantitative proteomic analysis (label-free LC-MS/MS) of mouse liver PEWM complex-enriched fractions prepared from *Mttp*<sup>+/+</sup> and *Mttp*<sup>-/-</sup> mouse livers (n=5 per genotype – Table 1). The heatmap shows the expression values of the indicated proteins. Each panel displays the proteins identified in this analysis and that are listed in the Gene Ontology database for the biological process indicated. (D) Estimation statistics analysis of the expression level of the Scap protein in PEWM complex-enriched fractions (see panel B; each dot indicates the expression level of Scap per animal). Data were plotted using the Gardner-Altman graph; the mean difference is indicated by the dot on the right panel and is plotted as a bootstrap sampling distribution. The 95% confidence interval is indicated by the vertical error bar.

Data were collected from mouse livers at 3 hours postprandial.

**Table S1.** Quantitative proteomic analysis (label-free LC-MS/MS) of PEWM complex-enriched fractions from *Mttp*<sup>-/-</sup> and *Mttp*<sup>+/+</sup> mouse livers.

[Click here to download Table S1](#)

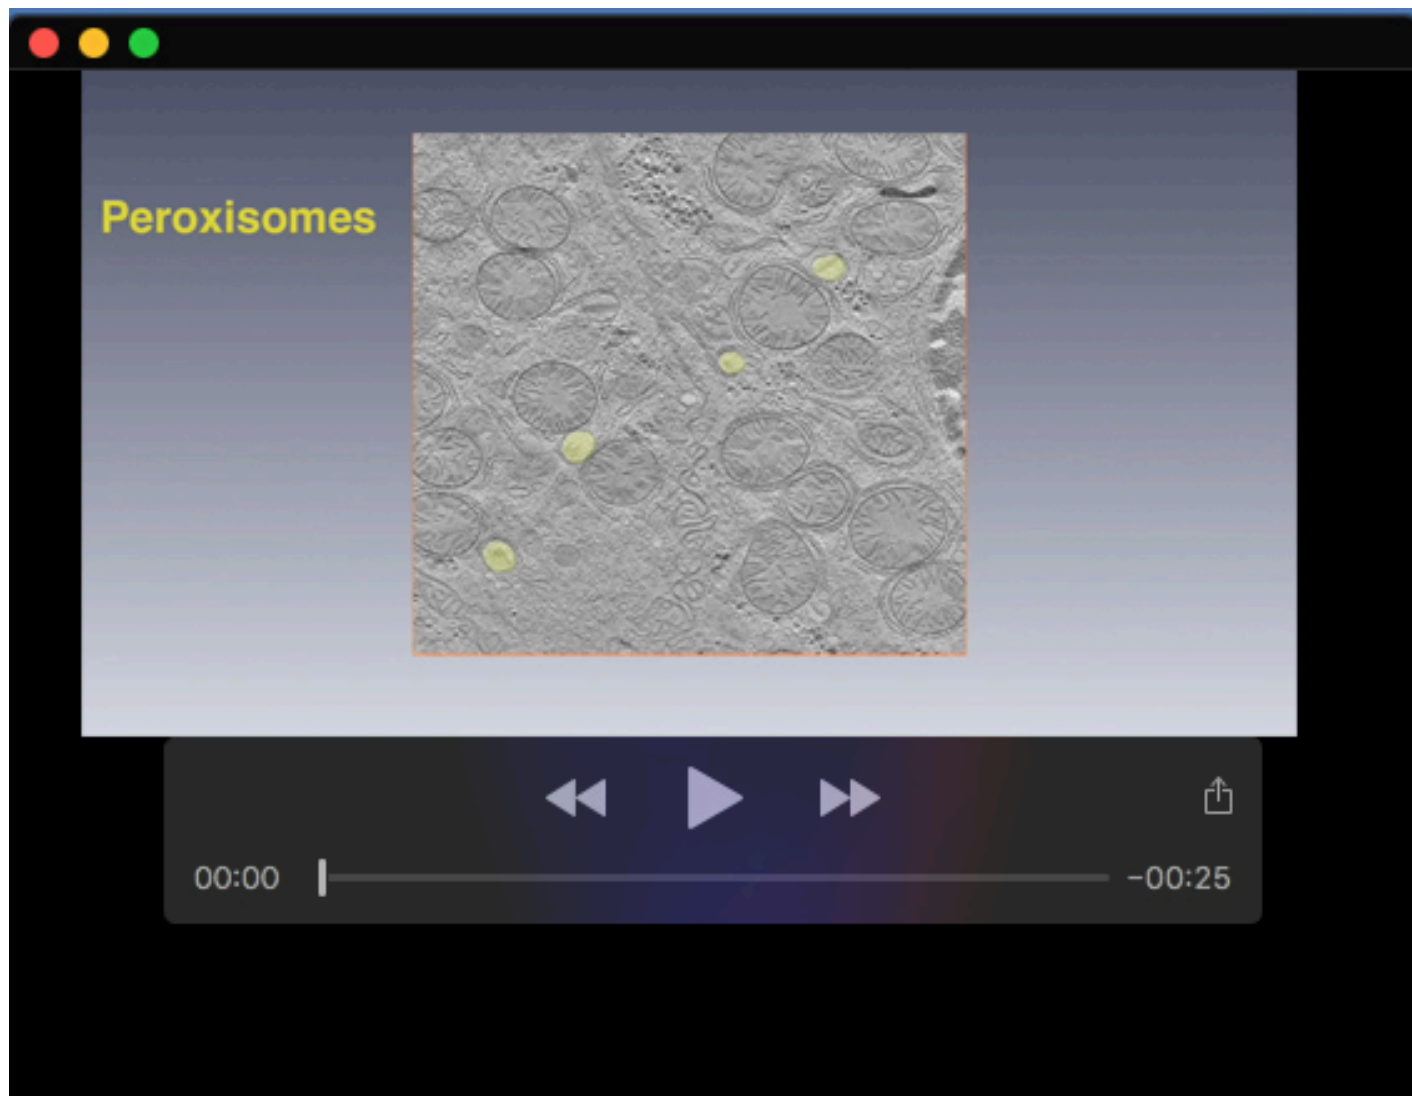

**Movie 1.** Serial section electron tomography and 3D reconstruction analysis showing wrapped ER-associated peroxisomes in two mouse liver hepatocytes.

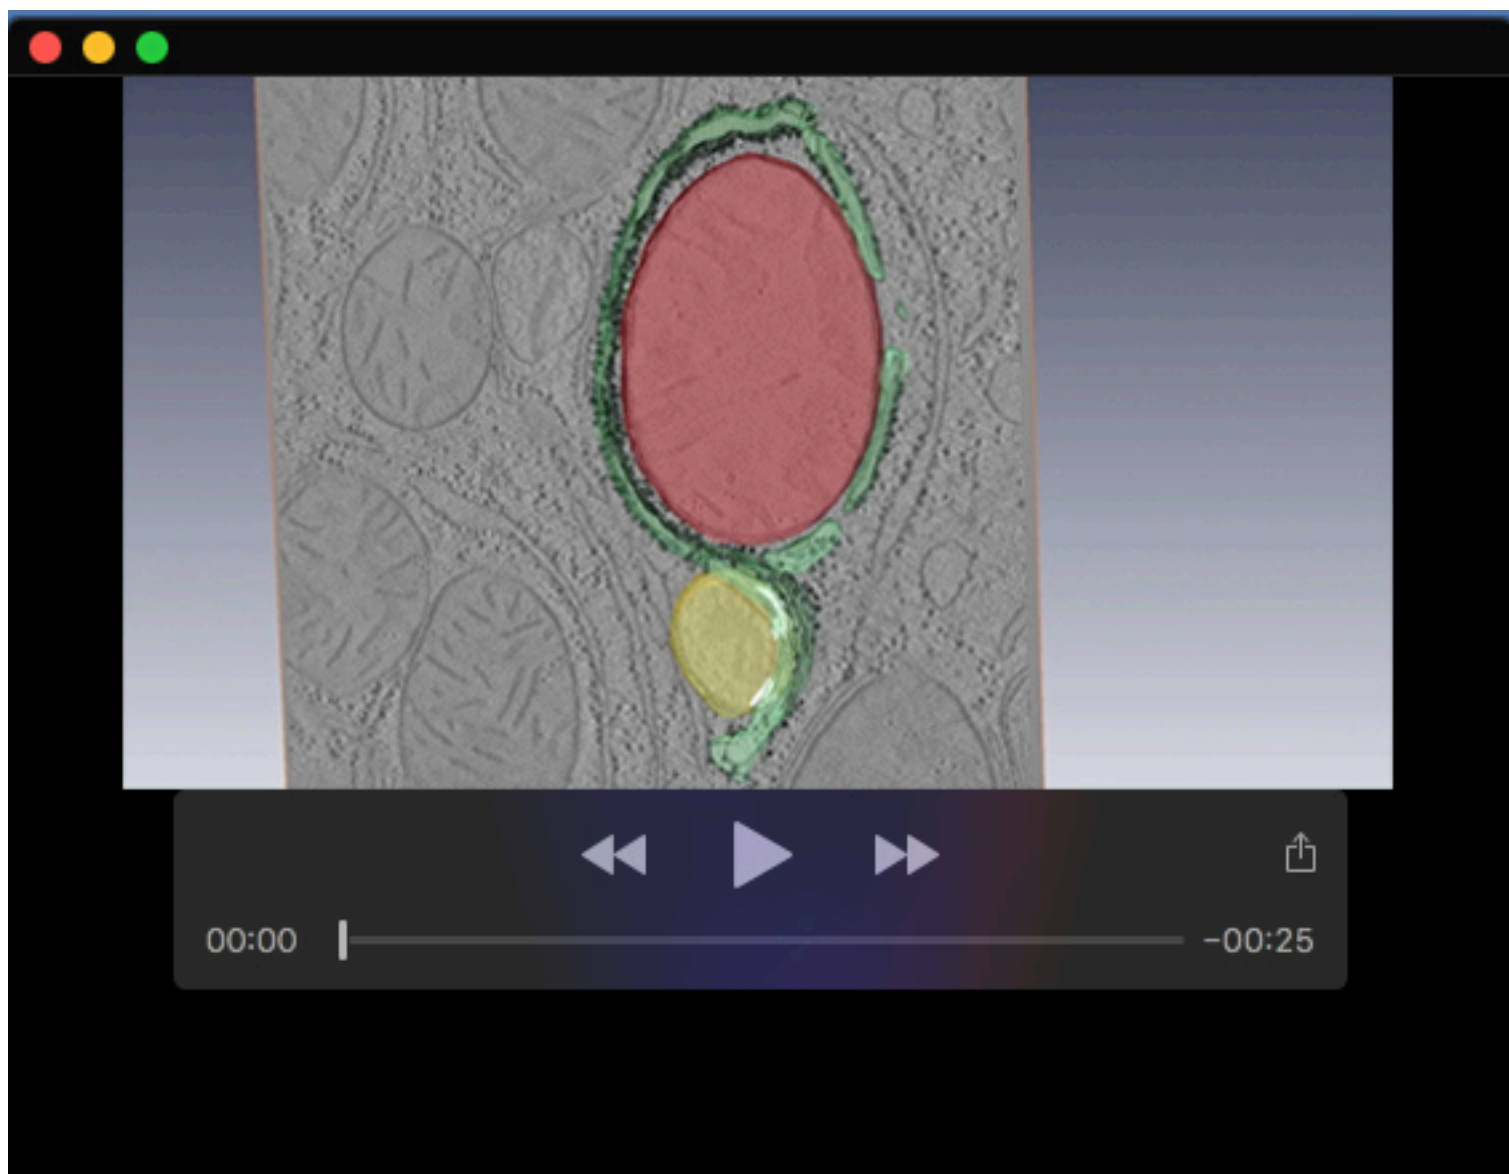

**Movie 2. Serial section electron tomography and 3D reconstruction analysis showing a Peroxisome-WrappER-Mitochondria (PEWM) complex with wrappER-peroxisome adhesion sites (mouse liver).**

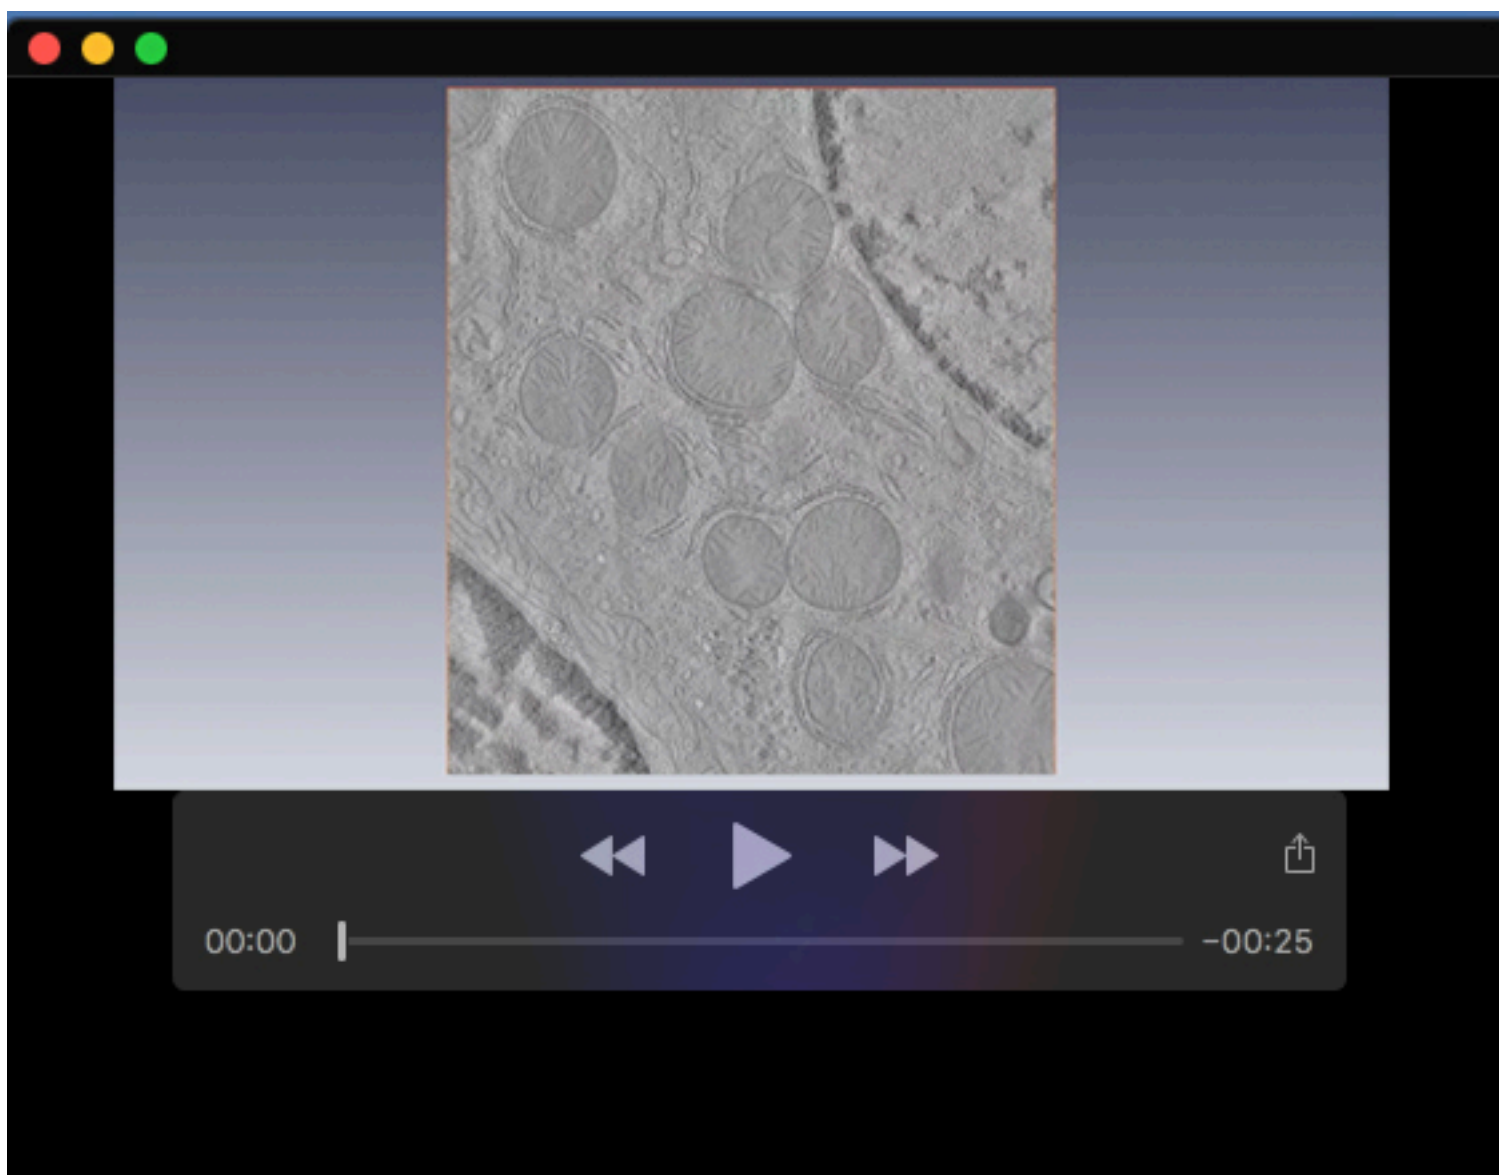

**Movie 3.** Serial section electron tomography and 3D reconstruction analysis showing Peroxisome-Wrapper-Mitochondria (PEWM) complexes integrated in the ER network of a mouse liver hepatocyte.
